# Supplementary material
Source: publisher site journal article supplement (https://static.cambridge.org/content/id/urn:cambridge.org:id:article:S1047951119003111/resource/name/S1047951119003111supp001.docx)
Supplement: Supplementary file 1 [file S1047951119003111supp001.docx]

**Supplementary Tables**

Supplementary Table 1- Causes of referral for echocardiography and follow-up decision after echocardiography among hospital-based individuals

|  | **Values, n (%)** |
| --- | --- |
| Total subjects | 73 |
| Causes of referral for echocardiography |  |
| Murmur | 29 (39.7%) |
| Palpitation | 11 (15%) |
| Chest pain with or without dyspnea and palpitation | 9 (12.3%) |
| Cyanosis with or without dyspnea and murmur | 6 (8.2%) |
| Murmur + Palpitation | 4 (5.5%) |
| First-degree relative with CHD | 3 (4.1%) |
| Dyspnea | 3 (4.1%) |
| Cardiomegaly on CXR | 2 (2.8%) |
| Hypertension | 2 (2.7%) |
| Fatigue + Bradycardia | 1 (1.4%) |
| Syncope | 1 (1.4%) |
| First-degree relative with SCD | 1 (1.4%) |
| Drug poisoning | 1 (1.4%) |
| Follow-up decision after echocardiography |  |
| No follow-up | 6 (8.2%) |
| Follow-up visits | 47 (64.4%) |
| Cardiac catheterization | 15 (20.5%) |
| Heart rhythm holter + Exercise stress test | 2 (2.7%) |
| Referral to other specialties | 2 (2.7%) |
| Other imaging modalities | 1 (1.4%) |

CHD = congenital heart disease; CXR = chest x-ray; SCD = sudden cardiac death

Supplementary Table 2- Diagnostic accuracy for more than mild regurgitation among hospital- and school-based individuals

|  | **Sensitivity %**  **(95% CI)** | **Specificity %**  **(95% CI)** |
| --- | --- | --- |
| AV regurgitation (NL vs. Abnormal)* |  |  |
| Hospital | 100 (63 – 100) | 100 (94.5 – 100) |
| School | NA | NA |
| MV regurgitation (NL vs. Abnormal)* |  |  |
| Hospital | 100 (78.8 – 100) | 100 (93.9 – 100) |
| School | 100 (29.2 – 100) | 99.3 (96.1 – 99.9) |

CI = confidence interval; AV = aortic valve; NL = normal; MV = mitral valve

* Abnormal was defined as greater than mild regurgitation
